# Supplementary material for: Toward Unifying Evolutionary Ecology and Genomics to Understand Positive Plant–Plant Interactions Within Wild Species
Source: Front Plant Sci. 2021 Jul 9;12:683373. doi: 10.3389/fpls.2021.683373 (PMC8299075; doi:10.3389/fpls.2021.683373)
Supplement: Supplementary Table 1 — Survey of GxG interaction studies in herbaceous wild plant species. The first six columns (columns A–F) indicate the serial number, the list of different plant species studied, their botanical family, main breeding system, life cycle and natural seed dispersal mode. Next six columns (columns G–L) describe the genetic material used including the main type of genetic variation studied (here experimental variation indicates use of F2 population, Recombinant Inbred Lines or Introgression Lines, while artificial variation includes use of mutant lines), number of genetic lines sampled (here NA indicates not available), number of populations sampled (here NA indicates not available and NR indicates not relevant), the scale of sampling (here WW indicates worldwide sampling), whether genetic differences between the lines were tested or assumed, and the habitats from which these lines were sampled from. Following 15 columns (columns M–AA) are divided to describe the experimental design of the studies including the main rationale, whether the GxG interactions were tested directly or indirectly, the experimental design (here solo refers to treatments where genotypes were grown alone, intra refers to ‘intragenotype’ treatment where two individuals of the same genotype were placed together and inter refers to ‘intergenotype’ treatment where two different genotypes were placed together; in the ‘inter’ column, ‘x’ in red indicates a mixed polyculture treatment) and conditions under which the experiments were performed (here GH indicates greenhouse and GC indicates growth chamber). Additionally, details about the specific treatments applied and the traits measured are listed. Next three columns (columns AB–AD) detail the main ecological questions addressed in each study, major findings with respect to intraspecific plant–plant interactions and the main type of positive interaction observed in each experimental study. Here KC indicates kin cooperation, OY indicates overyielding, coop [file Data_Sheet_1.xlsx]

## Sheet: supplementary table 1
Number	Species studied	Botanical family	Main breeding system	Life cycle	Seed dispersal mode	Main type of genetic variation	Number of genetic lines	Number of populations	Scale of sampling	Genetic difference	Habitats	Main rationale	Direct vs. indirect GxG interaction	Experimental design			Lab vs. nature	Experimental condition	Presence of treatment	Treatment identity		Measured traits				Total number of traits	Ecological questions answered wrt intraspecific plant-plant interaction	Major findings about intraspecific plant-plant interactions	Main type of interaction	Reference	Year	Journal
														solo	intra	inter				abiotic	biotic	root related traits	shoot related traits	life history traits	seed production related traits
1	Arabidopsis thaliana	Brassicaceae	selfing	annual	autochorous	experimental	F2	NR	WW	NR	NR	Others	direct	.	x	.	lab	in vitro	yes	shade	.	.	x	.	.	1	Individual vs. group selection using different environmental variation	.Evidence for group selection . Significant threeway interaction between environmental variation X individual selection X group selection .Environmental variation within demes reduced individual selection and variation among demes reduced group selection	.	Goodnight et al	1985	Evolution
2	Pytolacca americana	Phytolaceae	selfing	perennial	allochorous	natural	NA	NA	local	assumed	NA	kin/non-kin recognition	direct	x	x	x	lab	GH	yes	.	density	x	x	x	x	8	Plant response to neighbour identity and density	Transient increase in size as compared to non sibs	KC	Willson et al	1987	The American Naturalist
3	Abutilon theophrasti	Malvaceae	selfing	annual	allochorous	natural	NA	NA	local	assumed	NA	kin/non-kin recognition	direct	x	x	x	lab	GH	yes	.	density	x	x	x	.	5	Plant response to neighbour identity and density	Positive effect of sibling presence on seed germination and seedling survival	KC	Willson et al	1987	The American Naturalist
4	Solanum mauritanianum	Solanaceae	mixed	perennial	allochorous	natural	NA	NA	local	assumed	NA	kin/non-kin recognition	direct	x	x	x	lab	GH	yes	.	density	x	x	x	.	4	Plant response to neighbour identity and density	Positive effect of sibling presence on seed germination and seedling survival	KC	Willson et al	1987	The American Naturalist
5	Solanum lycopersicum	Solanaceae	mixed	perennial	allochorous	natural	NA	NA	local	assumed	NA	kin/non-kin recognition	direct	x	x	x	lab	GH	yes	.	density	x	x	x	x	4	Plant response to neighbour identity and density	No difference in competition sensitivity between sibs and non sibs	neutral	Willson et al	1987	The American Naturalist
6	Veronica peregrina	Scrophulariaceae	selfing	annual	autochorous	natural	72	2	local	assumed	disturbed and undisturbed (plowing)	diversity-productivity relationship	direct	.	x	x	lab	GH	yes	.	density	x	x	x	x	8	Genotypic responses to their immediate neighbourhood (intra or interspecific competition) in disturbed or undisturbed setting	.Central populations performed better in intraspecific and peripheral populations performed better in interspecific competition in undisturbed populations .Central populations germinated rapidly as opposed to peripheral populations .Central populations allocated more biomass to seeds and peripheral populations allocated more biomass to vegetative growth	OY	Linhart	1988	Evolution
7	Arabidopsis thaliana	Brassicaceae	selfing	annual	autochorous	experimental	F2	2	WW	NR	NR	diversity-productivity relationship	direct	.	x	x	lab	in vitro	yes	two temperatures, four nutrient levels	.	x	x	.	.	1	Genetic analysis of response to interacting genotypes	.Genotypic differences had direct contribution to mixure yields (non-additive direct variation) .Individuals within groups interacted with each other's growth response (non-additive variation)	OY	Griffing	1989	Genetics
8	Plantago lanceolata	Plantaginaceae	mixed	perennial	allochorous	natural	9	1	local	assumed	NA	kin/non-kin recognition	direct	.	x	x	lab	GH	.	.	.	.	x	.	x	4	Genotypic response to competition within pots	.No effect of relatedness on vegetative or dry biomass .No significant differences among different relatednesss for fruit weight or number of seed produced .Pots with closely related neighbours showed less variance in dry weights and produced more fruits	neutral	Tonsor	1989	The American Naturalist
9	Ambrosia dumosa	Asteraceae	mixed	perennial	allochorous	natural	NA	NA	NA	assumed	NA	kin/non-kin recognition	direct	.	x	x	lab	GC (root chambers)	.	.	.	x	.	.	.	1	Species root response to neighbour presence and identity	Root elongation rate reduced after contacting intraspecific root (interplant)	coop	Mahall and Callaway	1991	Proceedings of the National Academy of Sciences
10	Larrea tridentata	Zygophyllaceae	mixed	perennial	autochorous	natural	NA	NA	NA	assumed	NA	kin/non-kin recognition	direct	.	x	x	lab	GC (root chambers)	.	.	.	x	.	.	.	1	Species root response to neighbour presence and identity	Reduction in root growth with/without actual physical contact(intraspecific interplant)	coop	Mahall and Callaway	1991	Proceedings of the National Academy of Sciences
11	Impatiens capensis	Balsaminaceae	mixed	annual	autochorous	natural	28	2	local	assumed	understory of oak-hickory woods	kin/non-kin recognition	direct	x	x	x	lab	GH	.	.	.	x	x	x	.	3	Genotypic responses to neighbour identity (sibling vs. non sibling)	.No significant effect of competitive relatedness or distance between parental locations .No evidence for resource partitioning hypothesis	neutral	Argyres and Schmitt	1992	American Journal of Botany
12	Impatiens capensis	Balsaminaceae	mixed	annual	autochorous	natural	16	1	local	assumed	shaded area	diversity-productivity relationship	direct	.	x	x	lab	GH	.	.	.	.	x	.	.	5	Pot genetic variance influencing productivity and infestation by 2 greenhouse pests	.Positive correlation of phenotypic and genotypic variation .No effect of genetic variation on infestation rates .Less than expected variance among different treatments for overall productivity	neutral	Burt and Bell	1992	Journal of Evolutionary Biology
13	Polygonum pensylvanicum	Polygonaceae	mixed	annual	allochorous	natural	25	1	local	assumed	NA	diversity-productivity relationship	direct	x	.	x	lab	GH	yes	.	density	.	x	x	x	6	Relative importance of GxG interaction in different neighbour densities	.Variability in size and reproductive output increased with increasing density .Evidence for assymetric competition in dense populations (genotpes with size advantage grew better in dense clumps) .Genotype ranks changed within treatments	OY	Thomas and Bazazz	1993	Ecological Monographs
14	Ambrosia dumosa	Asteraceae	mixed	perennial	allochorous	natural	NA	2	regional	assumed	NA	kin/non-kin recognition	direct	.	x	x	lab	GC (root chambers)	.	.	.	x	.	.	.	1	Root elongation pattern in response to neighbour presence and identity	.Reduction in root elongation rates upon contact with another root from same region .Reduction in root elongation rate also upon contact with a root of a clone	neutral	Mahall and Callaway	1996	American Journal of Botany
15	Arabidopsis thaliana	Brassicaceae	selfing	annual	autochorous	natural	5	multiple	regional	assumed	NA	diversity-productivity relationship	direct	.	x	x	lab	GC (growth tunnels)	yes	CO2 levels (two)	.	.	x	.	x	3	Effect of neighbour identity and level of CO2 on GXG interaction	.Under ambient conditions, genotypes performed better at intragenotype level .Under elevated conditions, mixtures performed better	KC+OY	Andalo et al	2001	Ecology
16	Allium vineale	Amaryllidaceae	clonal	perennial	allochorous	natural	5	2	local	assumed	NA	diversity-productivity relationship	direct	.	x	x	lab	GC	yes	.	field soil treated with fungicide	x	x	.	.	2	Genotypic responses to soil fungal community and neighbour presence and origin (same vs. different population)	.Positive effect of presence of fungal community on plant performance .Specificity in the plant-mycorrhizal interaction at the population level	OY	Ronsheim and Anderson	2001	Oecologia
17	Cakile edentula	Brassicaceae	selfing	annual	autochorous+allochorous	natural	14	1	local	assumed	lake shore	kin/non-kin recognition	direct	.	x	x	natural	native habitat	.	.	.	.	x	.	x	4	Effect of relatednes of neighbour on plant size and fitness	.Individual selection for plant size in all treatments .In sibling groups, individuals with heavier stem had higher fitness .Siblings growing with heavier but shorter neighbours also had high fitness	KC	Donohue 2003	2003	The American Naturalist
18	Triplasis purpurea	Poaceae	selfing	annual	autochorous	natural	20	1	local	assumed	NA	kin/non-kin recognition	direct	x	x	x	lab	GH	.	.	.	.	x	.	x	3	Effect of genetic relatedness on otcome of intra and interfamily competition	The shoot mass and mean seed mass of target plants was greater in interfamily than in intrafamily competition	OY	Cheplick and Kane	2004	International Journal of Plant Sciences
19	Potentilla anserina	Rosaceae	mixed	perennial	autochorous	natural	50	14	regional	assumed	NA	kin/non-kin recognition	direct	x	x	x	lab	GH	.	.	.	.	x	.	x	4	Genotypic responses to competition with same or different clone (genet)	.Allocation pattern independent of relatedness of competitor .Increase in allocation to sexual structures with response to competition (stress) as opposed to allocation to vegetative structures under no stress (no competition)	neutral	Rautiainen et al	2004	Journal of Ecology
20	Arabidopsis thaliana	Brassicaceae	selfing	annual	autochorous	artificial	12	NR	NR	NR	NR	kin/non-kin recognition	direct	x	x	x	lab	GC	yes	high and low nutrient level	.	.	x	.	x	2	Genotypic interactions under different fertility conditions	.Competitive response and effect variable among genotypes depending on nutrient conditions .Consistency among genotype's relative competitve ability (rank) in both fertility conditions	KC	Cahill et al	2005	Journal of Ecology
21	Solidago altissima	Asteraceae	clonal	perennial	allochorous	natural	21	1	local	estimated (mean difference between genotypes 25%)	silty clay loamy soil :dominated by Verbesina sp	diversity-productivity relationship	direct	.	x	x	natural	field	.	.	.	.	x	.	.	2	Variation in genotypic diversity affecting stand productivity and arthopod diversity	.Increased genotypic diversity correlated with increased aboveground productivity which translated to increase in arthopod diversity	OY	Crutsinger et al	2006	Science
22	Trifolium repens	Fabaceae	mixed	perennial	allochorous	natural	8	1	local	assumed	NA	kin/non-kin recognition	direct	x	x	x	lab	GC	.	.	.	x	x	.	.	3	Genotypic response to presence of neighbour of different levels of physiological and genotypic differences	.Self interaction (connected ramets) led to lower biomass, lesser number of ramets and lower root length and mass than any other treatment .No treatment X genotype effect	neutral	Falik et al	2006	Plant Signaling and Behaviour
23	Arabidopsis thaliana	Brassicaceae	selfing	annual	autochorous	experimental	340 RILs	NR	WW	NR	NR	Others	direct	x	.	x	lab	GH	yes	.	density	.	x	x	.	2	Identifying QTLs associated with seasonal and density dependency for flowering time	.In each RIL population, between 4 and 10 QTLs found to be associated with seasonal and density variation .Four common QTLs in all environments in BayXSha or LerXCvi RILs	.	Botto and Collucio	2007	Plant, Cell and Envitonment
24	Cakile edentula	Brassicaceae	selfing	annual	autochorous+allochorous	natural	8	1	local	assumed	NA	kin/non-kin recognition	direct	x	x	x	lab	GC	.	.	.	x	x	x	.	3	Allocation patterns of groups comprised of kin or stranger neighbours	.Stranger groups had more root allocation than sibling groups .No differences were observed in root allocation when plants grown solo	KC	Dudley and File	2007	Biology Letters
25	Plantago erecta	Plantaginaceae	mixed	annual	allochorous	natural	NA	6	local	assumed	populations from serpentine and non serperntine soil	Others	direct	.	.	x	lab +natural	GH+field	yes	serpentine (high stress) and non-serpentine soil	density	.	x	x	.	3	Intraspecific variation of positive interactions under different levels of biotic and abiotic sresses	.Strong soil X seed source effect (in all densities). Evidence of local adaptation .Net facilitative effect of serpentine seeds on low nutrient level .Competition (at the emergence stage) and facilitation (during biomass accumulation)	.	Espeland and Rice	2007	Ecology
26	Arabidopsis thaliana	Brassicaceae	selfing	annual	autochorous	experimental	114 RILS	NR	WW	NR	NR	Others	direct	.	.	x	lab	GC	.	.	.	.	x	x	x	6	Identifying QTLs having direct and indirect effects on size, development and fitness in GXG interactions	.15 QTLs for DGE 11 of which had pleiotroipc effects on focal plants .13 of these were related to IGE, six of which showed pleitropic functions with multiple effects	.	Mutic and Wolf	2007	Molecular Ecology
27	Glechoma hederacea	Rosaceae	mixed	perennial	autochorous	natural	15	1	local	assumed	woodland margins and scrubby grassland	kin/non-kin recognition	direct	.	x	x	lab	GH (root observation chambers)	.	.	.	x	.	.	.	1	Effect of physical connection and genetic identity of neighbour on spatial root distribution pattern	Roots avoided neighbour root irrespective of connection to the neighbour genetic identity	neutral	Semchenko et al	2007	New Phytologist
28	Fragaria vesca	Lamiaceae	mixed	perennial	allochorous	natural	7	1	local	assumed	woodland margins and scrubby grassland	kin/non-kin recognition	direct	.	x	x	lab	GH (root observation chambers)	.	.	.	x	.	.	.	1	Effect of physical connection and genetic identity of neighbour on spatial root distribution pattern	Roots showed symmetrical root growth towards and away from intraspecific ramet neighbour	neutral	Semchenko et al	2007	New Phytologist
29	Solidago altissima	Asteraceae	clonal	perennial	allochorous	natural	21	1	local	estimated (mean difference between genotypes 25%)	silty clay loamy soil :dominated by Verbesina sp	diversity-productivity relationship	direct	.	x	x	natural	field	.	.	.	.	x	.	.	4	Effect of genetic diversity on colonization success of other native and exotic species (Extended phenotype)	.Biomass of colonizing species negatively correlated with genotypic richness. Genotype specific effect on richness and cover of colonizers .Stem density of focal increased with increasing genotypic diversity	OY	Crutsinger et al	2008	Ecology Letters
30	Viola tricolor	Violaceae	outcrossing	annual	allochorous	natural	22	1	local	assumed	NA	kin/non-kin recognition	direct	.	x	x	lab	GH	yes	.	root intermingling	.	.	x	.	1	Influence of belowground resources and neighbour identity on pollen competitive ability	.Genotype specific respone to pollen tube growth when families under root competition .Siblings unaffected by sharing soil vs. being alone	KC	Lankinen	2008	Journal of Ecology
31	Arabidopsis thaliana	Brassicaceae	selfing	annual	autochorous	natural	14	9	local+regional	tested	NA	kin/non-kin recognition	direct	.	x	x	lab	in vitro + GC	yes	.	density	x	x	x	x	9	Effect of density and genetic relatedness on focal plant fitness/biomass	.No difference in kin/non-kin response for growth of focal plant. Also no differential gene expression between kin/non-kin .Biomass/fitness of plants affected by strength of competitive abilities of accession families used	neutral	Masclaux et al	2010	New Phytologist
32	Impatiens pallida	Balsaminaceae	selfing	annual	autochorous	natural	8	1	local	tested	NA	kin/non-kin recognition	direct	x	x	x	lab	GC	yes	light( high low R:FR)	.	x	x	.	x	6	Allocation pattern in response to kin/non-kin under light competition	.More leaf allocation among stranger pots as compared to kin pots .More stem elongation and branchiness in response to kin	KC	Murphy and Dudley	2009	American Journal of Botany
33	Cakile edentula	Brassicaceae	selfing	annual	autochorous+allochorous	natural	8	1	local	assumed	NA	kin/non-kin recognition	direct	.	x	x	lab	GH	.	.	.	x	x	x	.	6	Biomass allocation in pairs of kins or strangers	Lower root allocation among kin pairs regardless of seed size or time of harvest	KC	Bhatt et al	2010	New Phytologist
34	Arabidopsis thaliana	Brassicaceae	selfing	annual	autochorous	natural	2	2	WW	assumed	NA	kin/non-kin recognition	indirect	x	x	x	lab	in vitro	yes	addition of sodium orthovandate (root secretion inhibitor)	.	x	.	.	.	2	Genotype root response to root exudates from accessions of varying relatedness levels	.Plants exposed to siblings/strangers exudates had lower root allocation than own exudate .Addition of inhibitor deleted this effect	KC	Biedrzycki et al	2010	Communicative and Integrative Biology
35	Arabidopsis thaliana	Brassicaceae	selfing	annual	autochorous	natural	8	3	local +WW	assumed	NA	kin/non-kin recognition	indirect	x	x	x	lab	in vitro	.	.	.	x	x	.	.	4	Genotype root response to root exudates from accessions of varying relatedness levels	.Exposure to stranger root exudate induced greater lateral root formation than kin or stranger	KC	Biedrzycki et al	2010	Communicative and Integrative Biology
36	Abutilon theophrasti	Malvaceae	selfing	annual	allochorous	NR	commercial seeds used	NR	NR	NR	NR	Others	direct	x	.	x	natural	field	yes	soil heterogeneity pattern	.	x	.	.	.	1	Plant response to the presence of a competitor and heterogeneous resource distributions	.In solo, plants adopted broad rooting regardless of resource distribution .In competition treatments, under uniform resource: spatial segregation of roots. Patch center: overlapping or roots. Patch edge: intermediate root distribution	.	Cahill et al	2010	Science
37	Arabidopsis thaliana	Brassicaceae	selfing	annual	autochorous	natural	8	8	WW	assumed	NR	diversity-productivity relationship	direct	.	x	x	semi-natural	field	yes	soil fertilization	density	.	x	x	.	3	Influence of neighbour density and diversity on productivity under different nutrient conditions	.Mixtures produced more yield than monoculture (in presence or absence of herbivore) .Increasing genotypic diversity increased productivity and survival of plants .Increased genotypic diversity also associated with increased herbivore biomass	OY	Kotowska et al	2010	Journal of Ecology
38	Festuca pallens	Poaceae	outcrossing	perennial	allochorous	natural	NA	1	local	assumed	NA	Others	direct	x	.	x	natural	field	yes	.	density	.	x	x	.	6	.Genotype vegetative performance under high intraspecific competition .Genome size of germinating seedlings and juveniles with or without high competition	.Smaller variation in genome size in competition pots (elimination of small and large genome size extremes) .No relation between genome size and aboveground biomas	.	Smarda et al	2010	New Phytologist
39	Arabidopsis thaliana	Brassicaceae	selfing	annual	autochorous	experimental	23 RILS	NR	NR	NR	NR	kin/non-kin recognition	direct	x	x	x	lab	GH	.	.	.	.	x	x	x	5	Genotypic response to neighbour presence, identity and its effects on fitness	.Effect of neighbour presence depends on identity of neighbour .Higher fitness of target genotypes when in non-self competition rather than self competition	OY	Willis et al	2010	Journal of Evolutionary Biology
40	Arabidopsis thaliana	Brassicaceae	selfing	annual	autochorous	natural	4	4	WW	assumed	NR	diversity-productivity relationship	direct	x	x	x	lab	GC	yes	sterile ,non sterile, preconditioned soil with each genotype	sterile ,non sterile, preconditioned soil with each genotype	.	x	x	x	4	Genotypic response to growing on 3 different soil types (sterile, non-sterile or preconditioned with 4 accessions)	.Plants grown on preconditioned soil grew smaller and plants in sterile soil grew larger than non-sterile soil .All accessions grew best when in competition with Cvi ( smallest genotype amongst them)	OY	Aguilera et al	2011	PLoS One
41	Ipomea hederacea	Convolvulaceae	selfing	annual	allochorous	natural	3	1	local	assumed	NA	kin/non-kin recognition	direct	.	x	x	lab	GH	yes	light	.	x	x	.	x	4	Effect of competition for light (by virtue of having shared or individual stakes) among siblings or non-siblings	.Overall mean yield was same between kin or non kins .Kin groups produced more seeds .Non-kin individuals allocated more resources in root competition	KC	Biernaskie	2011	Proceedings of the National Society B: Biological Sciences
42	Andropogon gerardii	Poaceae	outcrossing	perennial	allochorous	natural	NA	1	local	assumed	tall grass prairie	kin/non-kin recognition	direct	x	.	x	lab	GH	yes	soil volume and nutrient level	.	x	x	.	.	3	Root morphology and biomass allocation of focal in response to neighbour presence and varying levels of nutrients	.Significant reduction in plant growth under low soil volume but could be compensated by extra nutrient addition .No significant response to neighbour presence alone	neutral	Markham and Halwas	2011	Plant Ecology and Diversity
43	Arabidopsis thaliana	Brassicaceae	selfing	annual	autochorous	natural	2	2	WW	assumed	NR	Others	direct	x	x	x	lab	in vitro	.	.	.	x	.	.	.	2	Root exudate profile of plants when grown solo vs. in the presence of neighbour (proteomic analysis conducted for solo and the co-cultured pairs )	.Total amount of defense protein in co-cultured pairs higher than solo treatments .Increase in defene or stress related proteins in control (Col-0 solo) .pR5 protein expresed only in Col-Ler combination	.	Badri et al	2012	PLoS One
44	Taraxacum officinale	Asteraceae	selfing	perennial	allochorous	natural	5	multiple	regional	tested	NA	diversity-productivity relationship	direct	.	x	x	natural	field	yes	fallow (favourable) vs. mowed plot	.	.	x	.	x	3	Effect of genotypic diversity on population performance over time	Increasing diversity within plots increased population performance (stronger with increasing time). This effect was prominent more in fallow than mowed plots	OY	Drummond and Vellend	2012	PLoS One
45	Ambrosia artemisiifolia	Asteraceae	mixed	annual	allochorous	natural	6	1	local	assumed	NA	kin/non-kin recognition	direct		x	x	lab	GH	yes	.	mycorrhiza addition	x	x	.	.	5	Plant growth and susceptibility to pathogen attack in response to neighbour identity and root fungal colonization	.Mycorrhizal network size and root colonization increased in siblings as compared to strangers .Soil fungal abundance was correlated to N acquistion by group and decrease in pathogen attack .No difference in biomass level between siblings and strangers	KC	File et al	2012	PLoS One
46	Lupinus angustifolius	Fabaceae	selfing	annual	allochorous	natural	9	1	local	assumed	NA	kin/non-kin recognition	direct	.	x	x	lab	GH	.	.	.	x	x	x	.	8	Genotypic response to competition with neighbours of different levels of relatedness	.Root proliferation levels same in different relatedness levels .Mean height of siblings less than cousins or strangers .Phenotypic heterogeneity in heterogeneous groups irrespective of level of relatedness	KC	Milla et al	2012	Annals of Botany
47	Arabidopsis thaliana	Brassicaceae	selfing	annual	autochorous	natural	4	4	WW	assumed	NA	diversity-productivity relationship	direct	.	x	x	lab	GH	yes	high and low nutrient level (heat stress in one replicate)	.	.	.	x	x	2	Effect of nutrient and neighbour identity on plant performance	.Mixtures achieved stable yield across different nutrient conditions through compensation which intensified under low nutrient conditions	coop	Creissen et al	2013	Annals of Botany
48	Arabidopsis thaliana	Brassicaceae	selfing	annual	autochorous	natural	4	4	WW	assumed	NA	diversity-productivity relationship	direct	.	x	x	lab	GH	yes	.	root intermingling		x	x	x	3	Effect of nutrient and neighbour identity on plant performance	.Mixtures achieved slightly greater yields than monocultures .High competitive ability of genotypes led them to produce high yield in mixtures but they also suffered most in monoculture	OY	Creissen et al	2013	Annals of Botany
49	Artemisia tridentata	Asteraceae	selfing	perennial	autochorous	natural	27	1	local	tested	NA	kin/non-kin recognition	direct	.	.	x	natural	field	yes	.	clipping leaf of neighbour	.	x	.	.	1	Proportion of leaf damage by herbivores when focal plant receives volatile cues from clipped neighbour (close or distant relative)	Branches that received cues from clipped close relative experienced less leaf herbivory over growing season than the branches receiving cues from a distantly related donor.This effect was consistent over the different experiments	KC	Karban et al	2013	Proceedings of the Royal Society B: Biological Sciences
50	Arabidopsis thaliana	Brassicaceae	selfing	annual	autochorous	experimental	20 epiRILs	NR	NR	NR	NR	diversity-productivity relationship	direct	.	x	x	lab	GH	yes	.	density, weed competition, pathogen attack	x	x	.	.	2	Pot productivity (composed of different epigenotypic diversity levels) in presence of competition and/or pathogen	Epigentic diversity increased productivity of population and suppressed weedy competitiors and this effect was enhanced in presence of competition and pathogens	OY	Latzel et al	2013	Nature Communications
51	Sedum album	Crassulaceae	selfing	perennial	allochorous	natural	8	NA	local	assumed	NA	kin/non-kin recognition	direct	.	x	x	lab +natural	GH + field	.	.	.	.	x	x	x	4	Vegetative and reproductive performance of genotypes based on neighbour identity	Indirect genetic effects observed for both parameters in different years for both genotypes (attributing to limiting resource competition)	neutral	Anderson	2014	PLoS One
52	Arabidopsis thaliana	Brassicaceae	selfing	annual	autochorous	natural	7	7	WW	assumed	NA	diversity-productivity relationship	indirect	.	x	x	lab	GH	yes	soil conditioning with different accessions	soil conditioning with different accessions	x	x	.	x	9	Effect of soil conditioning by accessions of different genetic relatedness( soil conditioned by same, genetically close relatives or distant relatives)	.Mixture had higher overall biomass than monoculture .Accession specific difference in strength and direction of PSF	OY	Bukowski and Petermann	2014	Ecology and Evolution
53	Deschampsia cespitosa	Poaceae	outcrossing	perennial	allochorous	natural	10	1	local	assumed	NA	kin/non-kin recognition	indirect	x	x	x	lab	GC	.	.	.	x	.	.	.	4	Role of root exudates in mediating neighbour recognition	.Sibling exudates suppressed root proliferation at the whole root system level; giving evidence for kin recognition and population specificity of response . Increased root density was mainly through root morphological changes rather than biomass allocation	KC	Semchenko et al	2014	New Phytologist
54	Phragmites australis	Poaceae	clonal	perennial	allochorous	natural	6	NA	regional	tested	NA	diversity-productivity relationship	direct	.	x	x	natural	field	.	.	.	x	x	.	.	4	Effect of increasing genotypic richness on primary productivity and N removal from soil	.Genotypic richness increased primary prooductivity (more for belowground than aboveground) and improved water quality by removal of N .Genotypic selection effects enhanced over complementarity effects in polycultures as time increased	OY	Tomimatsu et al	2014	Oecologia
55	Trifolium pratense	Fabaceae	outcrossing	perennial	allochorous	artificial	3	NR	NR	NR	NR	kin/non-kin recognition	direct/indirect	.	x	x	lab	GH	yes	soil (either Trifolium or Lolium conditioned): sterile vs. non sterile	soil (either Trifolium or Lolium conditioned): sterile vs. non sterile	x	x	.	.	3	Genotypic response to home and away soil biota	.PSF occurred at intraspecific level .Evidence for co-adaptation between plants and soil biota in which they have a history of interaction .PSF levels could change between generations to derive better benefit of the home soil biota	indirect KC	Wagg et al	2015	Oikos
56	Arabidopsis thaliana	Brassicaceae	selfing	annual	autochorous	natural	7	7	WW	assumed	NA	kin/non-kin recognition	direct		x	x	lab	GH	yes	R:FR and blue light	.		x	.	x	2	Genotypic to neighbour identity (kin/ nonkin) in light competition	Plants recognized kin neighbours by horizontally reorienting leaf growth on R/FR and blue light perception	KC	Crepy and Casal	2015	New Phytologist
57	Arabidopsis thaliana	Brassicaceae	selfing	annual	autochorous	artificial	8	NR	NR	assumed	NR	kin/non-kin recognition	direct	.	x	x	lab	GH	yes	R:FR and blue light	.	.	x	.	x	2	Genotypic to neighbour identity (kin/non-kin) in light competition	Mutations in light perception genes impaired leaf orientation response in kin neighbours	KC	Crepy and Casal	2015	New Phytologist
58	Pseudoroegneria spicata	Poaceae	selfing	perennial	allochorous	natural	11	multiple	local+WW	assumed	NA	diversity-productivity relationship	direct	x	.	x	lab	GH	.	.	.	x	.	.	.	2	Intergenotypic interactions (same vs. different population)	Inter-population intergenotype pairs produced more yield than intra-population intergenotype pairs	OY	Yang et al	2015	AoB Plants
59	Pseudoroegneria spicata	Poaceae	selfing	perennial	allochorous	natural	11	multiple	local+WW	assumed	NA	kin/non-kin recognition	direct	.	x	x	lab	GC (root chambers)	.	.	.	.	x	.	x	1	Root growth in response to neighbour identity (same vs. different population)	Root elongation rate was lower upon contact with root from intra-population genotype than inter-population genotype	KC	Yang et al	2015	AoB Plants
60	Polygonum cespitosum	Polygonaceae	selfing	annual	allochorous	natural	26	5	regional	assumed	NA	diversity-productivity relationship	direct	.	x	x	lab	GH	yes	light/shade	.	.	x	.	x	2	Competitive response (CR) and competitive effect (CE) under different light conditions (light/shade)	.In full sun, HP genotypes showed greater CR ad CE .In shade, no difference in behaviour of genotypes	OY	Corliss and Sultan	2016	American Journal of Botany
61	Medicago minima	Fabaceae	selfing	annual	autochorous	natural	4	4	local	assumed	soil collected underneath thyme plant and soil collected away from thyme plants	kin/non-kin recognition	direct	.	x	x	lab +natural	GH + field	yes	thyme or no thyme soil	.	.	x	x	.	2	Effect of neighbour identity and nutrient level (thyme) on survival and vegetative output of genotypes	.Thyme soil affected species rank in survival and biomass production .M.minima had more survival in thyme soil under intraspecific competition	KC	Ehlers et al	2016	Journal of Ecology
62	Medicago rigidula	Fabaceae	selfing	annual	autochorous	natural	4	4	local	assumed	soil collected underneath thyme plant and soil collected away from thyme plants	kin/non-kin recognition	direct	.	x	x	lab +natural	GH + field	yes	thyme or no thyme soil	.	.	x	x	.	2	Effect of neighbour identity and nutrient level (thyme ) on survival and vegetative output of genotypes	.Thyme soil affected species rank in survival and biomass production .M. rigidula alone had better survival on thyme soil and poorest survival on no thyme soil under intraspecific competition	neutral	Ehlers et al	2016	Journal of Ecology
63	Trifolium repens	Fabaceae	outcrossing	perennial	allochorous	natural	8	1	local	tested	riverine grassland	diversity-productivity relationship	direct	.	x	x	lab	GH	yes	well watered vs. dry condition	.	x	x	.	.	8	Effect of genotypic and phenotypic relatedness on GXG interaction in well watered vs. dry condition	.Large ramets outperfomed (more biomass accumulation) the small ones in the diverse stands .Competitive advantage led to trade off for the number of ramets produced by the large sized plants .Water condition didn’t affect this relation: genotypes behaved the same way in dry and well watered conditions	OY	Huber et al	2016	Frontiers in Plant Science
64	Arabidopsis thaliana	Brassicaceae	selfing	annual	autochorous	natural	2	2	WW	assumed	NA	kin/non-kin recognition	direct	x	x	x	lab	in vitro	yes	nutrient rich (external addition of N,P,K, Fe, S, Ca)/poor	.	x	.	.	.	1	Effect of neighbour presence and identity (kin, stranger) on genotype's root architecture pattern	.Solo and sibling lateral root number significantly lower than stranger .At low nutrient level, strangers produced more lateral root than solo and sibling. This effect was eliminated upon nutrient addition .Samples supplemented with N or P showed reductions in the total lateral root number in both STRANGER and KIN samples .External exudate application of accession grown in starved condition induc…	KC	Palmer et al	2016	Plant Signaling and Behaviour
65	Baccharis salicifolia	Asteraceae	outcrossing	perennial	allochorous	natural	14	1	local	assumed	marsh	diversity-productivity relationship	direct	.	x	x	natural	native habitat	yes	.	aphid infestation	x	x	x	.	4	Effects of diversity in sex (mono vs. male and female genotypes together) and growth rate ( mono vs. fast- and slow-growing genotypes together) on above- and belowground consumers	.Sexual diversity increased root growth but reduced density of generalist aphid consumer and its associated ants but no effect on mycorrhizae colonization .Growth rate diversity influenced abundance and density of specialised aphid .Fast and slow growth rate did not affect overall plant biomas while female and male genotypes which did not differ in growth rate showed diversity effects on biomass	neutral	Abdala-Roberts et al	2017	PLoS One
66	Trifolium fucatum	Fabaceae	outcrossing	annual	autochorous	natural	NA	4	local	assumed	NA	Others	direct	x	X	X	lab	GH	.	.	.	x	x	.	.	2	Root transciptome analysis in response to conspecific and congeneric competition	.Competition reduced biomass more in conspecific than congeneric competition .Differential response to competition. Twice as many genes differentially expressed under conspecific competition	.	Bowsher et al	2017	Journal of Ecology
67	Xanthium italicum	Asteraceae	selfing	annual	allochorous	natural	NA	2	local	assumed	NA	kin/non-kin recognition	direct	x	x	x	natural	field	.	.	.	x	x	.	.	8	Relative Interaction Index (combining above and below ground trait measures for biomass and root and shoot architecture) of individuals grown next to neighbours of different relatedness levels	.More shoot and less root allocation among kin neighbours .Dramatic but indistinctive response to presence of neighbour as compared to solitary plants	KC	El-Gawad et al	2017	Community Ecology
68	Arabidopsis thaliana	Brassicaceae	selfing	annual	autochorous	natural	3	3	WW	assumed	NA	kin/non-kin recognition	direct	.	x	x	lab	GH	yes	.	different planting distances	x	x		x	10	Integrated performace (traits comprising of both vegetative and reroductive traits) by combining multiple traits to study response to kin vs. non kin neighbour	.Integrated performance of plants in kin groups better than non-kin group for Col-0 and Ler .For Ws, kin response depended on planting distance, with strangers performing better at larger ditances and kins at smaller ditances	KC	Jie et al	2017	Journal of Resources and Ecology
69	Deschampsia cespitosa	Poaceae	outcrossing	perennial	allochorous	natural	10	1	local	assumed	NA	diversity-productivity relationship	direct	.	x	x	lab	GH	yes	soil conditioned by one or mixture of accessions	soil conditioned by one or mixture of accessions	x	x	.	.	4	Root litter decomposition and feedback between plant and soil biota	.Genetically diverse groups decompose litter faster and the soil had higher N concentration ( easy uptake for the next generation) .Suppression of growth in conditioned soil( both sibling and genetically diverse ) as opposed to control indicating resource depletion	OY	Semchenko et al	2017	New Phytologist
70	Polygonum persicaria	Polygonaceae	selfing	annual	allochorous	natural	5	3	regional	assumed	genotypes collected from full sun, moderate shade, full shade habitat	diversity-productivity relationship	direct	.	x	x	lab	GH	yes	light/shade	.	.	x	x	x	6	Effect of parental treatment (light/shade) on progeny performance in competition under light/shade condition	.Shaded parents progenies had higher fitness in shade and produced offsprings with increased fitness in shade and better competitior .Parental shade increased reproductive output for progeny in neighbour and understorey shade, but decreased fitness for progeny in dry conditions	KC	Baker et al	2018	Philosophical Transactions of the Royal Society B
71	Arabidopsis thaliana	Brassicaceae	selfing	annual	autochorous	natural	4	4	WW	assumed	NA	diversity-productivity relationship	indirect	.	x	x	lab	GH	yes	soil conditioning by same/ different accession	soil conditioning by same/different accession	.	x	.	x	5	Genotype response to growth in home (conditioned by same accession) or away (conditioned by different accession)	.Increased negative PSF as the taxonomic distance increased between players .Negative PSF at intraspecific level indicating role of intraspecific diversity in maintaining coexistence .Individual accessions differed in the direction and strength of the feedback. Bur-o showed positive PSF	OY	Bukowski et al	2018	Ecology and Evolution
72	Phalaris arundinacea	Poaceae	clonal	perennial	autochorous	natural	8	3	local	tested	NA	diversity-productivity relationship	direct	x	.	x	natural	field	yes	disturbed/undisturbed plot	disturbed/undisturbed plot, density	x	x	.	.	4	Effect of genotype richness on plot productivity under different disturbance treatments (intact vs. disturbed condition)	.Plant biomass in disturbed treatment was greater than intact for all genotype combinations .In intact treatment, overyielding was observed that declined with increasing genotype richness .In disturbed treatment, underyielding was seen which declined reaching almost as much as monoculture yield at high genotype richness	KC+OY	Collins et al	2018	Journal of Plant Ecology
73	Arabidopsis thaliana	Brassicaceae	selfing	annual	autochorous	natural	3	3	WW	assumed	NA	kin/non-kin recognition	direct	.	x	x	lab	GH	yes	.	density	x	x	.	x	6	Effect of planting density and relatedness in GXG interaction	.In large pair densities, kin cooperation occured for competitive traits and traits that increase fitness .But in small and medium densities, kin cooperation for competitive traits	KC	Li and Xu	2018	Plant Ecology
74	Moricandia moricandiodes	Brassicaceae	outcrossing	annual	autochorous	natural	28	1	local	assumed	NA	kin/non-kin recognition	direct	x	x	x	lab	GH	yes	.	density	.	x	x	x	5	Difference in floral advertisement of focals when grown next to neighbours of varying relatedness and density	.More investment in floral display by kin groups especially in dense clumps (resource competition did not diminish floral advertisement effort) .No effect of neighbour relatedness on resource competition (biomass of focal when solo> 3 neighbour> 6 neighbours	KC	Torices et al	2018	Nature Communications
75	Arabidopsis thaliana	Brassicaceae	selfing	annual	autochorous	natural	2	2	WW	assumed	NA	diversity-productivity relationship	direct	.	x	x	lab	GH	yes	nutrient poor condition (4 levels)	.	.	.	x	x	2	Effect of low nutrient soil (sand vs. peat rich soil) in pot productivity	Heritable positive interactions among accessions under low nutrient conditions	KC	Wuest and Niklaus	2018	Nature Ecology and Evolution
76	Arabidopsis thaliana	Brassicaceae	selfing	annual	autochorous	experimental	37 RILs	NR	NR	NR	NR	diversity-productivity relationship	direct	.	x	x	lab	GH	yes	nutrient poor condition	.	.	x	x	x	5	Effect of low nutrient soil (sand vs. peat rich soil) in determining interactions among different accessions	Resolution of this effect to a chromosomal region on chr 4 in this experimental population	KC	Wuest and Niklaus	2018	Nature Ecology and Evolution
77	Alternanthera philoxeroides	Amaranthaceae	clonal	perennial	autochorous	natural	10	10	WW	tested	five genotypes collected from US (introduced range) and five from Argentina (native range)	kin/non-kin recognition	direct	x	x	x	lab	GH	.	.	.	x	x	.	.	5	Effect of neighbor relatedness on intraspecific competitive ability	.When competing above‐ground with conspecifics, increased biomass in introduced genotypes and decreased in natives .Evidence of kin facilitation in above ground interaction as inferred from the changes in branch number	KC+OY	Zhang et al	2019	Journal of Ecology
78	Arabidopsis thaliana	Brassicaceae	selfing	annual	autochorous	artificial	6	NR	NR	NR	NR	kin/non-kin recognition	direct	x	x	x	lab	GH	yes	salinity tolerance (three levels)	.	.	.	x	x	2	GXG interactions under increasing stress conditions	.Evidence of SGH .Salt sensitive genotypes less affected by competition (tradeoff between competitive ability and stress tolerance) but depended more on facilitation .Facilitative effects of salt sensitive plants more than that of salt tolerant plants	KC	Zhang and Tielborger	2019	New Phytologist
79	Medicago truncatula	Fabaceae	selfing	annual	autochorous	natural	2	2	WW	assumed	NA	Others	indirect	.	x	x	lab	GH	yes	soil conditioning by same/ different accession	soil conditioning by same/different accession	x	.	.	.	1	Selection on rhizobial community of genotypes growing in unconditioned soil, home (conditioned by same accession) or away soil (conditioned by different accession)	.Soil and host environments indirectly affected rhizobial communities and had lasting effects across host generations .Genotype presence and identity explained respectively 22% and 12% of the variance in the strain composition of nodule communities	.	Burghardt et al	2019	Evolution
80	Arabidopsis thaliana	Brassicaceae	selfing	annual	autochorous	natural	60	60	WW	assumed	NA	Others	direct	x	x	x	lab	GC	yes	live vs. sterile soil collected from natural A.t population in Canada	live vs. sterile soil collected from natural A.t population in Canada	.	.	x	x	2	Soil microbial effects of plant response to intra/interspecific competition	.Genotypes varied in response to competition with soil microbes altering the fitness of individuals in different ecological conditions .In solo and intraspecific competition, comparable fitness in live and sterile soil , but live soil increased fitness under interspecific competition	.	Fitzpatrick et al	2019	Journal of Evolutionary Biology
81	Solidago altissima	Asteraceae	clonal	perennial	allochorous	natural	32 and 29	2	local	tested	genotypes collected from plots maintaining ambient herbivory or no herbivory	kin/non-kin recognition	indirect	.	x	x	nature	field	yes	.	herbivory	.	x	.	.	3	Testing whether herbivory drives the evolution of VOC-mediated communication	. Genotypes from populations that experienced selection herbivory induced resistance in all neighboring conspecifics . Genotypes from populations maintained in herbivore exclusion induced resistance only in kin neighbors	KC + group benefit	Kalske et al	2019	Current Biology
82	Arabidopsis thaliana	Brassicaceae	selfing	annual	autochorous	natural	2	2	WW	assumed	NA	kin/non-kin recognition	indirect	.	x	x	lab	GC	yes	.	volatile emission from intact vs. herbivore damaged plant	x	x	.	x	5	Effect of genetic background and presence of herbivore on indirect plant-plant communication	.increased plant growth, increase in reproductive output of receivers in response to indirect exposure to emitter neighbors with a different genotype .herbivory and plant genotype of emitter plants influenced responses related growth and reproduction in receiver plants	KC	Shimola and Bidart	2019	American Journal of Plant Sciences
83	Aegilops triuncialis	Poaceae	selfing	annual	autochorous	natural	16	3	regional	assumed	NA	kin/non-kin recognition	direct	x	x	x	lab	GH	yes	high vs. low soil fertility	.	x	x	.	.	2	Competitive interactions between sibling and nonsibling pairs of seedlings	.At seedling stage, stronger competitive effects on kin than nonkin (∼40% reduction for kin and ∼25% for nonkin)	OY	Smith et al	2019	The American Naturalist
84	Medicago minima	Fabaceae	selfing	annual	autochorous	natural	4	4	local	assumed	NA	kin/non-kin recognition	direct	.	x	x	lab	GC	yes	activated carbon added to pots vs. not	.	.	x	.	.	3	Competitive root response to growing next to kin vs. non-kin neighbor	Root growth (both number and length of roots) away vs. toward a neighbour varied across focal genotypes and treatments	KC+OY	Tomiolo et al	2019	bioRxiv
85	Medicago minima	Fabaceae	selfing	annual	autochorous	natural	4	4	local	assumed	NA	kin/non-kin recognition	direct	x	x	x	lab	GC	yes	activated carbon added to pots vs. not	.	.	x	.	.	3	Effect of genotypic competitive ability and kin recognition on the outcome of competitive interactions	.Positive relationship in early leaves growth of focal and surrounding plants in kin treatments .Within-pot biomass variance was the smallest in kin treatments and the largest in mix treatments. Upon addition of AC, within-pot biomass variance increase by almost 3 fold in kin pots. Such changes were not observed in non-kin pots.	KC	Tomiolo et al	2019	bioRxiv
86	Glechoma hederacea	Rosaceae	mixed	perennial	autochorous	natural	NA	2	local	assumed	First population: along a stream edge with trees growing alongside. Second population: between a small woodland and grassland	kin/non-kin recognition	direct	x	x	x	lab	GC	yes	water limitation vs. not	.	x	.	.	.	5	Root response to the presence of kin/non-kin neighbor and the modification of interactions under water limited conditions	.Evidence for kin recognition as seen by roots avoiding growth toward a non-kin neighbor but not avoiding the roots of a kin plant .Water limitation significantly affected plant growth and root parameters, unrelated to neighbor identity	KC	Goddard et al	2020	Frontiers in Ecology and Evolution
87	Arabidopsis thaliana	Brassicaceae	selfing	annual	autochorous	natural	60	60	WW	tested	NA	diversity-productivity relationship	direct	.	x	x	nature	field	yes	high and low resource conditions	.		x	x	x	6	Effect of intraspecific diversity on productivity and fecundity	.Increasing stand genetic diversity increased fecundity in high-resource conditions .Using association mapping, a major flowering time locus AGL-22 identified for association with underyielding in polycultures	KC	Turner et al	2020	Proceedings of the Royal Society B: Biological Sciences
88	Medicago truncatula	Fabaceae	selfing	annual	autochorous	natural	9	4	WW	tested	NA	kin/non-kin recognition	direct	.	x	x	lab	GH	yes	drought vs. well watered	.	.	x	.	x	5	Effect of genetic identity, provenance and abiotice stress on intraspecific interactions	.Focal plants grew larger in non-kin than in kin mini-communities .Genotypic variation in growth and response to competition had a stronger effect on growth than mini-community type	OY	Tomiolo et al	2020	bioRxiv
89	Plantago asiatica	Plantaginaceae	selfing	perennial	autochorous	natural	20	20	local	assumed	NA	kin/non-kin recognition	direct	.	x	x	lab	GH	yes	.	interspecific competition with Trifolium repens	x	x	.	.	3	Effect of genetic identity on plasticity of aboveground architecture during interspecific competition	Siblings increased leaf placement towards competitor plants, and that placement was correlated negatively with the biomass of competitor	KC	Yamawo and Mukai	2020	Oecologia
90	Plantago asiatica	Plantaginaceae	selfing	perennial	autochorous	natural	30	30	local	assumed	NA	kin/non-kin recognition	direct	.	x	x	lab	GH	yes	.	interspecific competition with Trifolium repens	.	x	.	x	2	Effect of genetic identity on seed production during interspecific competition	Seed production by focal plants competing with T. repens was greater in individuals paired with siblings	KC	Yamawo and Mukai	2020	Oecologia
91	Solanum lycopersicum	Solanaceae	mixed	perennial	allochorous	experimental	3 introgression lines	NR	NR	NR	NR	diversity-productivity relationship	direct	.	x	x	nature	field	yes	.	herbivory	.	x	.	.	4	Effect of plant chemical diversity on herbivores and their interactions with predators	.Effect of predators on herbivore performance depended on the specific chemotypic mixture of plants .Emergent effects of plant chemotype diversity on the predator-prey interaction	OY	Hauri et al	2021	Ecological Applications

## Sheet: supplementary table 2
Number	Species studied	Measured traits				Number of traits				Extended phenotypes		Total traits	Reference	Year
		root related traits	shoot related traits	life history traits	seed production related traits	root related traits	shoot related traits	life history traits	seed production related traits	Trait	number
1	Arabidopsis thaliana	.	leaf area	.	.	.	1	.	.	.	.	1	Goodnight et al	1985
2	Pytolacca americana	dry biomass	plant height, dry biomass, number of true leaves	seedling germination	presence of buds, flowers, fruits	1	3	1	3	.	.	8	Willson et al	1987
3	Abutilon theophrasti	dry biomass	leaf number, dry biomass	seedling germination, flowering time	.	1	2	2	.	.	.	5	Willson et al	1987
4	Solanum mauritanicum	dry biomass	length of longest leaf, dry biomass	seedling germination	.	1	2	1	.	.	.	4	Willson et al	1987
5	Lycopersicon lycopersicum	dry biomass	plant height	seedling germination	reproductive status	1	1	1	1	.	.	4	Willson et al	1987
6	Veronica peregrina	dry biomass	plant height, dry biomass	seedling germination, survival, days to flowering	number of capsules per plant, total seed production	1	2	3	2	.	.	8	Linhart	1988
7	Arabidopsis thaliana	whole plant weight	whole plant weight	.	.	1	.	.	.	.	.	1	Griffing	1989
8	Plantago lanceolata	.	dry biomass	.	length of seeds, biomass of reproductive structures, no of seeds	.	1	.	3	.	.	4	Tonsor	1989
9	Ambrosia dumosa	root elongation pattern	.	.	.	1	.	.	.	.	.	1	Mahall and Callaway	1991
10	Larrea tridentata	root elongation pattern	.	.	.	1	.	.	.	.	.	1	Mahall and Callaway	1991
11	Impatiens capensis	dry biomass	dry biomass	seed biomass	.	1	1	1	.	.	.	3	Argyres and Schmitt	1992
12	Impatiens capensis	.	height, diameter of node, total number of nodes, dry biomass, herbivory	.	.	.	5	.	.	.	.	5	Burt and Bell	1992
13	Polygonum pensylvanicum	.	height,leaf area, stem diameter, dry biomass	timing of reproductive onset	biomass of flowers, fruits, and subtending structural parts	.	4	1	1	.	.	6	Thomas and Bazazz	1993
14	Ambrosia dumosa	root length	.	.	.	1	.	.	.	.	.	1	Mahall and Callaway	1996
15	Arabidopsis thaliana	.	dry biomass	.	seed number, number of fruits	.	1	.	2	.	.	3	Andalo et al	2001
16	Allium vineale	fresh mass of new bulbils and offsets	leaf height	.	.	1	1	.	.	.	.	2	Ronsheim and Anderson	2001
17	Cakile edentula	.	height, stem weight	.	number of flowers and fruits	.	2	.	2	.	.	4	Donohue 2003	2003
18	Triplasis purpurea	.	dry biomass of shoots	.	number of seeds, mean seed mass	.	1	.	2	.	.	3	Cheplick and Kane	2004
19	Potentilla anserina	.	number of ramets, number of leaves, dry biomass	.	biomass of flowers (including flower buds)	.	3	.	1	.	.	4	Rautiainen et al	2004
20	Arabidopsis thaliana	.	dry biomass	.	silique number	.	1	.	1	.	.	2	Cahill et al	2005
21	Solidago altissima	.	dry biomass	.	.	.	1	.	.	Arthopod abundance	1	2	Crutsinger et al	2006
22	Trifolium repens	root length, biomass	shoot biomass	.	.	2	1	.	.	.	.	3	Falik et al	2006
23	Arabidopsis thaliana	total leaf number	.	days to flowering	.	1	.	1	.	.	.	2	Botto and Coluccio	2007
24	Cakile edentula	dry biomass of pot	dry biomass	biomass of reproductive structures (seed, fruits, and supporting stems and pedicels)	.	1	1	1	.	.	.	3	Dudley and File	2007
25	Plantago erecta	.	dry biomass	seed mortality, seedling emergence	.	.	1	2	.	.	.	3	Espeland and Rice	2007
26	Arabidopsis thaliana	.	height, leaf number	bolting time	Flower number, bud number, silique number	.	2	1	3	.	.	6	Mutic and Wolf	2007
27	Glechoma hederacea	root distribution pattern	.	.	.	1	.	.	.	.	.	1	Semchenko et al	2007
28	Fragaria vesca	root distribution pattern	.	.	.	1	.	.	.	.	.	1	Semchenko et al	2007
29	Solidago altissima	.	stem density	.	.	.	1	.	.	Richness, cover and biomass of native and exotic colonists	3	4	Crutsinger et al	2008
30	Viola tricolor	.	.	in vitro pollen tube growth	.	.	.	1	.	.	.	1	Lankinen	2008
31	Arabidopsis thaliana	biomass (in vitro), SRL, root proliferation	biomass (in vitro), crown size,SLA	height:base ratio, root:shoot biomass	silique number (GH)	3	3	2	1	.	.	9	Masclaux et al	2010
32	Impatiens pallida	dry biomass of pot	Node height, total plant height, and branching, dry biomass	.	dry biomass of reproductive structures	1	4	.	1	.	.	6	Murphy and Dudley	2009
33	Cakile edentula	dry biomass of pot	hypocotyl height, number of leaves, dry biomass of stem	number of cotyledons, cotyledon biomass	.	1	3	2	.	.	.	6	Bhatt et al	2010
34	Arabidopsis thaliana	number of lateral roots, length of primary roots	.	.	.	2	.	.	.	.	.	2	Biedrzycki et al	2010
35	Arabidopsis thaliana	number of lateral roots, length of primary roots, longest lateral root	hypocotyl length	.	.	3	1	.	.	.	.	4	Biedrzycki et al	2010
36	Abutilon theophrasti	root distribution pattern	.	.	.	1	.	.	.	.	.	1	Cahill et al	2010
37	Arabidopsis thaliana	.	dry biomass	survival	.	.	1	1	.	Insect biomass	1	3	Kotowska et al	2010
38	Festuca pallens	.	total leaf number, number of dead and green leaves, dry biomass	germination time, seed biomass, relative genome size	.	.	3	3	.	.	.	6	Smarda et al	2010
39	Arabidopsis thaliana	.	rosette diameter	flowering time, height of inflorescence, the number of axillary branches differentiated	number of fruit produced	.	1	3	1	.	.	5	Willis et al	2010
40	Arabidopsis thaliana	.	dry biomass, leaf number	infloresence height	silique number	.	2	1	1	.	.	4	Aguilera et al	2011
41	Ipomea hederacea	dry biomass of pot	mean plant height, height inequality in pot	.	seed yield of pot	1	2	.	1	.	.	4	Biernaskie	2011
42	Andropogon gerardii	root length, dry biomass	dry biomass	.	.	2	1	.	.	.	.	3	Markham and Halwas	2011
43	Arabidopis thaliana	.	.	.	.	.	.	.	.	Root exudate profile	1	1	Badri et al	2012
44	Taraxacum officinale	.	total leaf area, biomass	.	seed production	.	2	.	1	.	.	3	Drummond and Vellend	2012
45	Ambrosia artemisiifolia	biomass	dry biomass, N accumulation, susceptibility to pathogen attack	.	.	1	3	.	.	Mycorrhiza quantification	1	5	File et al	2012
46	Lupinus angustifolius	root length and dry biomass	crown size, height, diameter, leaf area, dry biomass	seedling height	.	2	5	1	.	.	.	8	Milla et al	2012
47	Arabidopsis thaliana	.	.	height of longest inflorescence at the onset of silique maturation	seed weight	.	.	1	1	.	.	2	Creissen et al	2013
48	Arabidopsis thaliana	.	rosette diameter	height of longest inflorescence at the onset of silique maturation	seed weight	.	1	1	1	.	.	3	Creissen et al	2013
49	Artemisia tridenta	.	.	.	.	.	.	.	.	Herbivory damage	1	1	Karban et al	2013
50	Arabidopsis thaliana	total biomass of pot	total biomass of pot	.	.	1	1	.	.	.	.	2	Latzel et al	2013
51	Sedum album	.	number of shoots	survival	number of fruits, panicles	.	1	1	2	.	.	4	Anderson	2014
52	Arabidpsis thaliana	root length, surace area, volume and diameter	rosette diameter, stem height, dry biomass	.	number of siliques, avg no.seeds per silique, avg. no. seeds per plant	4	3	.	2	.	.	9	Bukowski and Petermann	2014
53	Deschampsia cespitosa	specific root length, root branching intensity, root dry mass, root length density	.	.	.	4	.	.	.	.	.	4	Semchenko et al	2014
54	Phragmites australis	dry biomass, N accumulation	dry biomass, N accumulation	.	.	2	2	.	.	.	.	4	Tomimatsu et al	2014
55	Trifolium pratense( 2X and 4X populations)	mycorrhizal colonization,bacterial, AM and non AM fungal richness in soil	dry biomass	.	.	1	1	.	.	Microbiota (Fungal/bacterial) richness	1	3	Wagg et al	2015
56	Arabidopsis thaliana	.	leaf position	.	seed yield	.	1	.	1	.	.	2	Crepy and Casal	2015
57	Arabidopsis thaliana	.	leaf position	.	seed yield	.	1	.	1	.	.	2	Crepy and Casal	2015
58	Pseudoroegneria spicata	dry biomass, total biomass	total biomass of pot	.	.	1	1	.	.	.	.	2	Yang et al	2015
59	Pseudoroegneria spicata	root elongation rate	.	.	.	1	.	.	.	.	.	1	Yang et al	2015
60	Polygonum cespitosum	.	dry biomass	.	dry biomass mature achenes, immature achenes, inflorescences, and reproductive support tissues	.	1	.	1	.	.	2	Corliss and Sultan	2016
61	Medicago minima	.	dry biomass	survival	.	.	1	1	.	.	.	2	Ehlers et al	2016
62	Medicago rigidula	.	dry biomass	survival	.	.	1	1	.	.	.	2	Ehlers et al	2016
63	Trifolium repens	root allocation	ramet number and weight, length of stolon, internode, petiole, leaf size, dry biomass	.	.	1	7	.	.	.	.	8	Huber et al	2016
64	Arabidopsis thaliana	lateral root number	.	.	.	1	.	.	.	.	.	1	Palmer et al	2016
65	Baccharis salicifolia	dry biomass	dry biomass	.	.	1	1	.	.	Mycorrhizal and insect abundance	2	4	Abdala-Roberts et al	2017
66	Trifolium fucatum	.	shoot biomass	.	.	.	1	.	.	Root transcriptome analysis	1	2	Bowsher et al	2017
67	Xanthium italicum	root length, number, angle, biomass	shoot number, length, angle, weight	.	.	4	4	.	.	.	.	8	El-Gawad et al	2017
68	Arabidopsis thaliana	root biomass	leaf number, area, leaf biomass, rosette size, plant height, tiller number, stem biomass	.	seed biomass, silique number	1	7	.	2	.	.	10	Jie et al	2017
69	Deschampia cespitosa	specific root length	length of the longest leaf, dry biomass, C and N content	.	.	1	3	.	.	.	.	4	Semchenko et al	2017
70	Polygonum persicaria	.	height, dry biomass	flowering time	number of achenes,biomass of mature and immature achenes, flowers and peduncles	.	2	1	3	.	.	6	Baker et al	2018
71	Arabidopsis thaliana	.	rosette diameter, stem height, dry biomass	.	number of siliques, weight	.	3	.	2	.	.	5	Bukowski et al	2018
72	Phalaris arundinacea	dry biomass	stem height, tiller number, dry biomass	.	.	1	3	.	.	.	.	4	Collins et al	2018
73	Arabidopsis thaliana	dry biomass	rosette area, leaf area, plant height and dry biomass	.	seed biomass	1	4	.	1	.	.	6	Li and Xu	2018
74	Moricandia moricandiodes	.	height, dry biomass	advertising effort(petal mass/tot biomass)	flower number, petal biomass	.	2	1	2	.	.	5	Torices et al	2018
75	Arabidopsis thaliana	.	.	flowering time	number of siliques	.	.	1	1	.	.	2	Wuest and Niklaus	2018
76	Arabidopsis thaliana	.	dry biomass, disease symptoms	flowering time, flowering bolt height	number of siliques	.	2	2	1	.	.	5	Wuest and Niklaus	2018
77	Alternanthera philoxeroides	dry biomass	number of branches with at least one node, stem length, total leaf area, dry biomass	.	.	1	4	.	.	.	.	5	Zhang et al	2019
78	Arabidopsis thaliana	.	.	survival	number of siliques	.	.	1	1	.	.	2	Zhang and Tielborger	2019
79	Medicago truncatula	.	.	.	.	.	.	.	.	rhizobial community diversity	1	1	Burghardt et al	2019
80	Arabidopsis thaliana	.	.	flowering time	total seed production	.	.	1	1	.	.	2	Fitzpatrick et al	2019
81	Solidago altissima	.	total leaf number, number of damaged leaves	.	.	.	2	.	.	VOC emission and characterization	1	3	Kalske et al	2019
82	Arabidopsis thaliana	biomass	Rosette diameter,plant height, biomass	.	fruit number	1	3	.	1	.	.	5	Shimola and Bidart	2019
83	Aegilops triuncialis	dry biomass	dry biomass	.	.	1	1	.	.	.	.	2	Smith et al	2019
84	Medicago minima	dry biomass, root length	dry biomass	.	.	2	1	.	.	.	.	3	Tomiolo et al	2019
85	Medicago minima	.	diameter, number of leaves, dry biomass	.	.	.	3	.	.	.	.	3	Tomiolo et al	2019
86	Glechoma hederacea	maximum depth and width of deepest root, maximum dept and width of widest root, total number of roots	.	.	.	5	.	.	.	.	.	5	Goddard et al	2020
87	Arabidopsis thaliana	.	Specific leaf area, canopy area, dry biomass	flowering time	number of siliques, length of siliques	.	3	1	2	.	.	6	Turner et al	2020
88	Medicago truncatula	.	plant mean diameter, height, number of leaves	.	fruit number	.	3	.	1	Soil microbiota	1	5	Tomiolo et al	2020
89	Plantago asiatica	dry biomass	leaf placement, dry biomass	.	.	1	2	.	.	.	.	3	Yamawo and Mukai	2020
90	Plantago asiatica	.	number of leaves	.	number of seeds	.	1	.	1	.	.	2	Yamawo and Mukai	2020
91	Solanum lycopersicum	.	plant height, number of leaves	.	.	.	2	.	.	Herbivore and its predator interaction	2	4	Hauri et al	2021
